# Supplementary material for: Natural orifice transluminal endoscopic gallbladder-preserving polypectomy: the real-world largest cohort study (with video)
Source: Research Square preprint supplement (doi:10.21203/rs.3.rs-6049962/v1), 2025-05-06
Supplement: Supplementary file 1 [file 4970b38a697c2883863e5e98.docx]

**EQ-5D questionnaire**

**Mobility** 1: I have no problems in walking about 2: I have some problems in walking about 3: I am confined to bed

**Self-care** 1: I have no problems with self-care 2: I have some problems washing or dressing myself 3: I am unable to wash or dress myself

**Usual activities** 1: I have no problems with performing my usual activities 2: I have some problems with performing my usual activities 3: I am unable to perform my usual activities

**Pain/ Discomfort** 1: I have no pain or discomfort 2: I have moderate pain or discomfort 3: I have extreme pain or discomfort

**Anxiety/ Depression** 1: I am not anxious or depressed 2: I am moderately anxious or depressed 3: I am extremely anxious or depressed
